# Supplementary material for: Dementia and the risk of short-term readmission and mortality after a pneumonia admission
Source: PLoS One. 2021 Jan 28;16(1):e0246153. doi: 10.1371/journal.pone.0246153 (PMC7842970; doi:10.1371/journal.pone.0246153)
Supplement: S3 Table — Abbreviations: aIRR: adjusted incidence rate ratio; CI: confidence interval. aAll analyses were adjusted for sex, age, calendar period, cohabitation status, length of stay, type of pneumonia diagnosis, time since discharge, somatic comorbidities, psychiatric comorbidities, and alcohol/substance abuse. (DOCX) [file pone.0246153.s008.docx]

**S3 Table. Adjusted incidence rate ratios (aIRRs) for the risk of 30-day readmission in pneumonia patients with dementia (defined in five different ways) versus those without dementia in 298,872 admissions**

|  | Model 3a  aIRR (95% CI) |
| --- | --- |
| **Without dementia** | 1 |
| **With dementia** |  |
| Main analysis | 1.07 (1.04-1.10) |
| Dementia identified only by diagnosis (ie a secondary healthcare contact) (N=15,707) | 1.09 (1.06-1.13) |
| Dementia identified only by an anti-dementia prescription (ie no diagnosis of dementia in the secondary health care) (N=1,302) | 1.04 (0.93-1.18) |
| Dementia identified by both a dementia diagnosis and an anti-dementia prescription (N=8,939) | 1.04 (0.99-1.09) |
| Dementia diagnosed above the age of 60 years (N=25,374) | 1.07 (1.04-1.10) |
| Dementia diagnosed within five years prior to the index admission (N=23,186) | 1.06 (1.03-1.09) |

Abbreviations: aIRR: adjusted incidence rate ratio; CI: confidence interval

aAll analyses were adjusted for sex, age, calendar period, cohabitation status, length of stay, type of pneumonia diagnosis, time since discharge, somatic comorbidities, psychiatric comorbidities, and alcohol/substance abuse.
